# Supplementary material for: Health-related quality of life loss associated with first-time stroke
Source: PubMed Central journal article supplement (PMC6349359; doi:10.1371/journal.pone.0211493), 2019-01-28
Supplement: pone.0211493.s001.pdf [file pone.0211493.s001.pdf]

**S1 Table. Baseline characteristics of S3 study participants: follow-up and loss to follow-up comparison at 3 month and 12 month.**

|                          | Follow-up at 3 months<br>(N = 419) | Loss to follow-up at 3 months<br>(N = 242) |         | Follow-up at 12 months<br>(N = 361) | Loss to follow-up at 12 months<br>(N = 300) |         |
|--------------------------|------------------------------------|--------------------------------------------|---------|-------------------------------------|---------------------------------------------|---------|
|                          | N (%)                              | N (%)                                      | p value | N (%)                               | N (%)                                       | p value |
| <b>Age</b> , mean (sd)   | 62.6 (10.8)                        | 63.3 (11.8)                                | 0.499   | 62.6 (10.8)                         | 63.2 (11.6)                                 | 0.369   |
| <b>Gender</b>            |                                    |                                            | 0.949   |                                     |                                             | 0.399   |
| Male                     | 276 (65.9)                         | 160 (66.1)                                 |         | 233 (64.5)                          | 203 (67.7)                                  |         |
| Female                   | 143 (34.1)                         | 82 (33.9)                                  |         | 128 (35.5)                          | 97 (32.3)                                   |         |
| <b>Ethnicity</b>         |                                    |                                            | 0.048   |                                     |                                             | 0.143   |
| Chinese                  | 269 (64.2)                         | 177 (73.1)                                 |         | 233 (64.5)                          | 213 (71.0)                                  |         |
| Malay                    | 109 (26.0)                         | 44 (18.2)                                  |         | 94 (26.0)                           | 59 (19.7)                                   |         |
| Indian and others        | 41 (9.8)                           | 21 (8.7)                                   |         | 34 (9.4)                            | 28 (9.3)                                    |         |
| <b>Marital status</b>    |                                    |                                            | 0.001   |                                     |                                             | 0.015   |
| Single                   | 40 (9.6)                           | 37 (15.3)                                  |         | 32 (8.9)                            | 45 (15.0)                                   |         |
| Married                  | 305 (72.8)                         | 147 (60.7)                                 |         | 265 (73.4)                          | 187 (62.3)                                  |         |
| Separated/ Divorced      | 17 (4.1)                           | 24 (9.9)                                   |         | 21 (5.8)                            | 20 (6.7)                                    |         |
| Widowed                  | 57 (13.6)                          | 34 (14.1)                                  |         | 43 (11.9)                           | 48 (16.0)                                   |         |
| <b>Primary caregiver</b> |                                    |                                            | 0.227   |                                     |                                             | 0.102   |
| Spouse                   | 219 (52.5)                         | 107 (44.6)                                 |         | 193 (53.6)                          | 133 (44.8)                                  |         |
| Child                    | 112 (26.9)                         | 68 (28.3)                                  |         | 92 (25.6)                           | 88 (29.6)                                   |         |
| Sibling                  | 21 (5.0)                           | 20 (8.3)                                   |         | 22 (6.1)                            | 19 (6.4)                                    |         |
| Maid/ others             | 22 (5.3)                           | 16 (6.7)                                   |         | 22 (6.1)                            | 16 (5.4)                                    |         |
| None                     | 43 (10.3)                          | 29 (12.1)                                  |         | 31 (8.6)                            | 41 (13.8)                                   |         |
| <b>Religion</b>          |                                    |                                            | 0.020   |                                     |                                             | 0.024   |
| Christianity             | 48 (11.5)                          | 36 (14.9)                                  |         | 43 (11.9)                           | 41 (13.7)                                   |         |
| Buddhism / Taoism        | 188 (44.9)                         | 123 (50.8)                                 |         | 161 (44.6)                          | 150 (50.0)                                  |         |
| Islam                    | 125 (29.8)                         | 47 (19.4)                                  |         | 107 (29.7)                          | 65 (21.7)                                   |         |

|                                      |            |            |       |            |            |       |
|--------------------------------------|------------|------------|-------|------------|------------|-------|
| Hinduism/ Others                     | 18 (4.3)   | 17 (7.0)   |       | 13 (3.6)   | 22 (7.3)   |       |
| No religion                          | 40 (9.6)   | 19 (7.9)   |       | 37 (10.3)  | 22 (7.3)   |       |
| <b>Restructured hospital</b>         |            |            | 0.130 |            |            | 0.074 |
| NNI @ TTSH                           | 109 (26.0) | 50 (20.7)  |       | 93 (25.8)  | 66 (22.0)  |       |
| NNI @ SGH                            | 78 (18.6)  | 33 (13.6)  |       | 55 (15.2)  | 56 (18.7)  |       |
| NUH                                  | 16 (3.8)   | 10 (4.1)   |       | 14 (3.9)   | 12 (4.0)   |       |
| KTPH                                 | 92 (22.0)  | 60 (24.8)  |       | 71 (19.7)  | 81 (27.0)  |       |
| CGH                                  | 124 (29.6) | 89 (36.8)  |       | 128 (35.5) | 85 (28.3)  |       |
| <b>Ward class</b>                    |            |            | 0.638 |            |            | 0.518 |
| B2 and higher                        | 214 (51.1) | 119 (49.2) |       | 186 (51.5) | 147 (49.0) |       |
| C                                    | 205 (48.9) | 123 (50.8) |       | 175 (48.5) | 153 (51.0) |       |
| <b>Survey mode at baseline</b>       |            |            | 0.960 |            |            | 0.540 |
| Stroke patient                       | 372 (89.0) | 213 (89.1) |       | 319 (88.4) | 266 (89.9) |       |
| Primary caregiver                    | 46 (11.0)  | 26 (10.9)  |       | 42 (11.6)  | 30 (10.1)  |       |
| <b>Subtype of stroke</b>             |            |            | 0.902 |            |            | 0.676 |
| Infarct (ischemic)                   | 368 (87.8) | 210 (87.5) |       | 314 (87.2) | 264 (88.3) |       |
| Haemorrhage (bleed)/ both            | 51 (12.2)  | 30 (12.5)  |       | 46 (12.8)  | 35 (11.7)  |       |
| <b>Episode of stroke</b>             |            |            | 0.816 |            |            | 0.706 |
| First stroke                         | 339 (80.9) | 194 (80.2) |       | 293 (81.2) | 240 (80.0) |       |
| Recurrent (2nd or subsequent stroke) | 80 (19.1)  | 48 (19.8)  |       | 68 (18.8)  | 60 (20.0)  |       |
| <b>Hypertension</b>                  |            |            | 0.499 |            |            | 0.169 |
| Yes                                  | 308 (73.5) | 172 (71.1) |       | 270 (74.8) | 210 (70.0) |       |
| No                                   | 111 (26.5) | 70 (28.9)  |       | 91 (25.2)  | 90 (30.0)  |       |
| <b>Hyperlipidaemia</b>               |            |            | 0.834 |            |            | 0.772 |
| Yes                                  | 301 (71.8) | 172 (71.1) |       | 260 (72.0) | 213 (71.0) |       |
| No                                   | 118 (28.2) | 70 (28.9)  |       | 101 (28.0) | 87 (29.0)  |       |
| <b>Diabetes Mellitus</b>             |            |            | 0.479 |            |            | 0.100 |
| Yes                                  | 178 (42.5) | 96 (39.7)  |       | 160 (44.3) | 114 (38.0) |       |

|                                                 |              |              |       |              |              |       |
|-------------------------------------------------|--------------|--------------|-------|--------------|--------------|-------|
| No                                              | 241 (57.5)   | 146 (60.3)   |       | 201 (55.7)   | 186 (62.0)   |       |
| <b>pre-stroke EQ index scores,</b><br>mean (sd) | 0.82 (0.27)  | 0.81 (0.30)  | 0.792 | 0.82 (0.28)  | 0.82 (0.28)  | 0.794 |
| <b>NIHSS,</b> mean (sd)                         | 4.87 (4.77)  | 4.76 (4.72)  | 0.697 | 4.72 (4.55)  | 4.96 (4.99)  | 0.712 |
| <b>MMSE,</b> mean (sd)                          | 23.42 (6.33) | 23.01 (6.38) | 0.314 | 23.32 (6.48) | 23.22 (6.18) | 0.533 |

---

NIHSS, National Institute of Health Stroke Scale; MMSE, Mini-Mental State Examination
